# Supplementary material
Source: MDPI journal article supplement (https://www.mdpi.com/2076-3417/8/8/1405)
Supplement: s1 [file s1]

Supplementary Materials for the Article

Effects of Natural Antioxidant Agents on the Bitumen Aging Process: An EPR and Rheological Investigation

Cesare Oliviero Rossi 1, Paolino Caputo 1, Saltanat Ashimova 1, Antonio Fabozzi 2,
Gerardino D’Errico 2,3,* and Ruggero Angelico 3,4,*

1 Department of Chemistry and Chemical Technologies, University of Calabria, I-87036 Arcavacata di Rende (CS), Italy; cesare.oliviero@unical.it (C.O.R.); paolino.caputo@unical.it (P.C.); salta_32@mail.ru (S.A.)

2 Department of Chemical Sciences, University of Naples Federico II, Complesso di Monte S. Angelo, via Cinthia, I-80126 Naples (NA), Italy; antonio.fabozzi@unina.it (A.F.); gerardino.derrico@unina.it (G.D’E.)

3 CSGI (Center for Colloid and Surface Science), Via della Lastruccia 3, I-50019 Sesto Fiorentino (FI), Italy

4 Department of Agricultural, Environmental and Food Sciences, University of Molise, Via De Sanctis, I-86100 Campobasso (CB), Italy; angelico@unimol.it (R.A.)

***** Correspondence: gerardino.derrico@unina.it (G.D’E.); Tel.: +39-081-674245. angelico@unimol.it (R.A.);
Tel.: +39-0874-404649


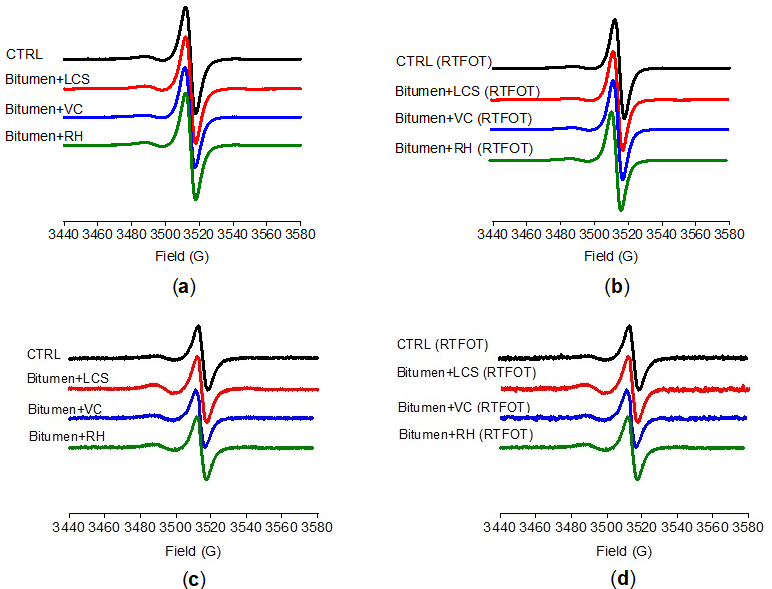


**Figure S1.** X-band EPR spectra of asphaltene and maltene fractions obtained from bitumen samples mixed with 2% w/w of antioxidants, registered at room temperature. CTRL indicates the control sample with no antioxidant added. (**a**) asphaltene fractions from unaged samples. (**b**) asphaltene fractions from aged samples. (**c**) maltene fractions from unaged samples. (**d**) maltene fractions from aged samples.

**Table S1.** Landè factor (*g*) of EPR signals of asphaltene and maltene fractions obtained both from unaged bituminous samples and after artificial aging through RTFOT.

| **Sample** | **Asphaltene** | | | | **Maltene** | | | |
| --- | --- | --- | --- | --- | --- | --- | --- | --- |
| **g of organic radicals** | | **g of vanadyl** | | **g of organic radicals** | | **g of vanadyl** | |
| unaged | aged | unaged | aged | unaged | aged | unaged | aged |
| CTRL | 2.0027 | 2.0027 | 2.0018 | 2.0019 | 2.0028 | 2.0028 | 2.0012 | 2.0012 |
| Bitumen + LCS | 2.0028 | 2.0028 | 2.0018 | 2.0019 | 2.0027 | 2.0027 | 2.0012 | 2.0012 |
| Bitumen + VC | 2.0028 | 2.0028 | 2.0018 | 2.0018 | 2.0027 | 2.0027 | 2.0014 | 2.0013 |
| Bitumen + RH | 2.0028 | 2.0027 | 2.0018 | 2.0019 | 2.0027 | 2.0027 | 2.0011 | 2.0012 |
